# Supplementary material for: Impact of Roasted Yellow Split Pea Flour on Dough Rheology and Quality of Fortified Wheat Breads
Source: MDPI journal article supplement (doi:10.3390/foods10081832), 2021-08-07
Supplement: s1 [file s1]

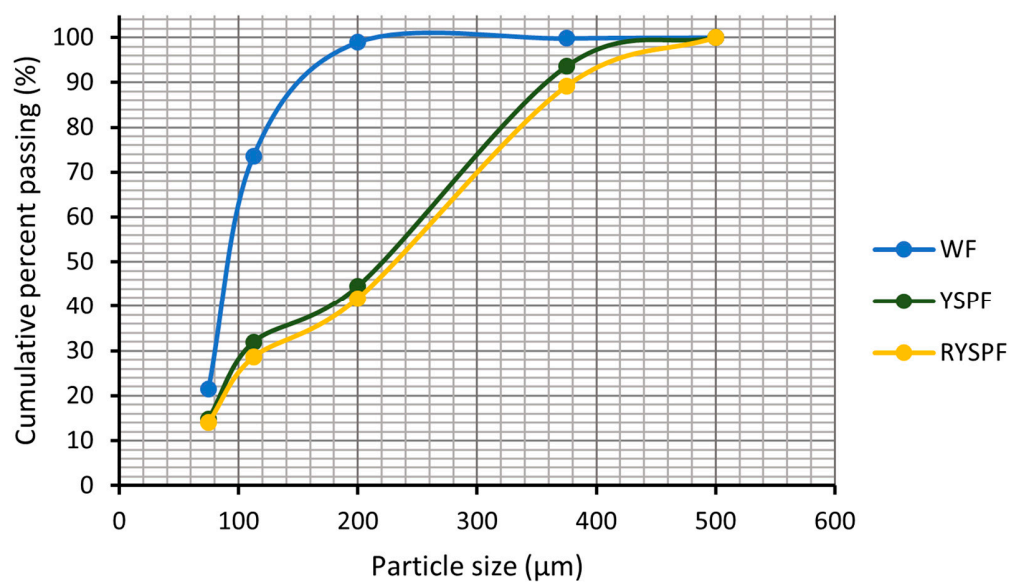

**Figure S1.** Cumulative distribution of particle size of wheat, and raw and roasted yellow split pea flours. Notation of samples as in Table 1.

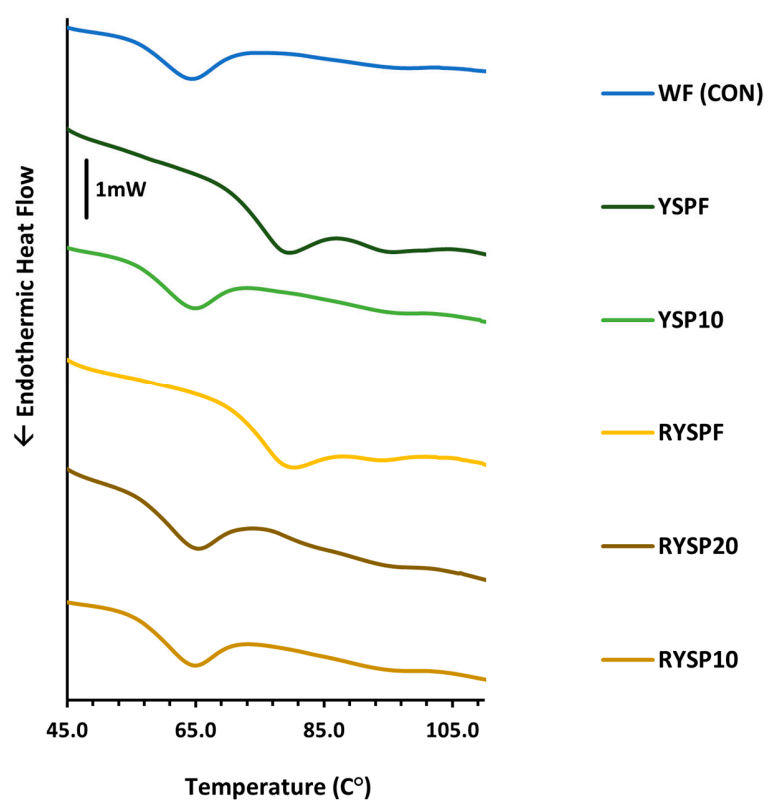

**Figure S2.** Representative DSC thermograms of starch gelatinization apparent enthalpy ( $\Delta H_{\text{gel}}$ ) of wheat flours, yellow split pea flours, and their mixtures. Notation of samples as in Table 1.

**Table S1.** Effect of flour from raw and roasted yellow split pea on gelatinization properties of wheat flour slurries (flour: water 30: 70 w/w) derived from differential scanning calorimetry (DSC).

| Sample symbol | Sample formulation                  | Gelatinization properties              |                                       |                                                     |
|---------------|-------------------------------------|----------------------------------------|---------------------------------------|-----------------------------------------------------|
|               |                                     | Onset temperature, T <sub>o</sub> (°C) | Peak temperature, T <sub>p</sub> (°C) | Apparent enthalpy, ΔH <sub>gel</sub> (mJ/mg starch) |
| WF (CON)      | 100% Wheat flour                    | 55.45 ± 0.31 a <sup>1</sup>            | 63.76 ± 0.06 a                        | 7.19 ± 0.50 a                                       |
| YSPF          | 100% Raw yellow split pea flour     | 71.18 ± 0.18 b                         | 78.31 ± 0.20 b                        | 6.75 ± 0.73 a                                       |
| RYSPPF        | 100% Roasted yellow split pea flour | 71.22 ± 0.04 b                         | 78.66 ± 0.37 b                        | 6.93 ± 0.78 a                                       |
| YSP10         | Mixture of 10% YSPF and 90% WF      | 55.86 ± 0.16 a                         | 64.05 ± 0.01a                         | 6.74 ± 0.29 a                                       |
| RYSPP10       | Mixture of 10% RYSPPF and 90% WF    | 55.90 ± 0.22 a                         | 64.01 ± 0.20a                         | 6.81 ± 0.30a                                        |
| RYSPP15       | Mixture of 15% RYSPPF and 85% WF    | n.d. <sup>2</sup>                      | n.d.                                  | n.d.                                                |
| RYSPP20       | Mixture of 20% RYSPPF and 80% WF    | 56.30 ± 0.25 a                         | 64.33 ± 0.66 a                        | 7.10 ± 0.66a                                        |

<sup>1</sup> Mean values with a same letter in the same column are not significantly different according to Tukey's test (p > 0.05).

<sup>2</sup> n.d.: not determined.

**Table S2.** Empirical dough properties of yellow split pea fortified wheat flour as determined by farinography and extensography.

|                                                  | CON <sup>1</sup>             | YSP10             | RYSP10             | RYSP15          | RYSP20           |
|--------------------------------------------------|------------------------------|-------------------|--------------------|-----------------|------------------|
| <b>Farinograph</b>                               |                              |                   |                    |                 |                  |
| Water absorption (%)                             | 58.5 ± 0.5 a <sup>2</sup>    | 60.5 ± 1.0 ab     | 61.5 ± 1.0 ab      | 61.5 ± 1.0 ab   | 62.5 ± 1.0 b     |
| Development time (min)                           | 2.3 ± 0.3 ab                 | 1.8 ± 0.4 a       | 3.0 ± 0.2 bc       | 3.2 ± 0.3 c     | 4.2 ± 0.2 d      |
| Stability(min)                                   | 10.2 ± 0.6 b                 | 10.4 ± 0.7 b      | 12.1 ± 1.5 b       | 7.5 ± 0.5 a     | 6.1 ± 0.3 a      |
| <b>Extensograph</b>                              |                              |                   |                    |                 |                  |
| <b>Stretch energy: Area (cm2)</b>                |                              |                   |                    |                 |                  |
| 45 min                                           | 96.9 ± 8.8 b, B <sup>3</sup> | 118.7 ± 7.8 c, B  | 105.9 ± 5.9 bc, A  | 96.8 ± 6 b, A   | 66.9 ± 11.8 a, A |
| 90 min                                           | 66.8 ± 5.5 a, A              | 116.3 ± 5.7 c, AB | 109.6 ± 10.8 bc, A | 94.9 ± 2 b, A   | 66.0 ± 10.6 a, A |
| 135 min                                          | 72.6 ± 6.8 ab, A             | 104.6 ± 10.3 c, A | 110.9 ± 5.9 c, A   | 93.0 ± 3 bc, A  | 55.6 ± 10.5 a, A |
| <b>Resistance to extension at 50mm (R50, BU)</b> |                              |                   |                    |                 |                  |
| 45 min                                           | 410 ± 30 ab, A               | 470 ± 60 b, A     | 400 ± 30ab, A      | 415 ± 10 ab, A  | 340 ± 30 a, A    |
| 90 min                                           | 580 ± 10 c, B                | 625 ± 20 c, B     | 440 ± 30 b, A      | 415 ± 10 b, A   | 310 ± 40 a, A    |
| 135 min                                          | 560 ± 25 b, B                | 555 ± 50 b, AB    | 450 ± 60 b, A      | 440 ± 30 b, A   | 300 ± 30 a, A    |
| <b>Extensibility (E, mm)</b>                     |                              |                   |                    |                 |                  |
| 45 min                                           | 142 ± 4 b, B                 | 137 ± 8 ab, A     | 152 ± 7 b, A       | 139 ± 2 ab, A   | 127 ± 10 a, A    |
| 90 min                                           | 90 ± 10 a, A                 | 124 ± 4 b, A      | 152 ± 4 c, A       | 146 ± 7 bc, A   | 124 ± 20 b, A    |
| 135 min                                          | 94 ± 6 a, A                  | 130 ± 8 b, A      | 154 ± 13 c, A      | 137 ± 2 bc, A   | 132 ± 15 bc, A   |
| <b>R50/E</b>                                     |                              |                   |                    |                 |                  |
| 45 min                                           | 2.9 ± 0.3 a, A               | 3.4 ± 0.6 a, A    | 2.6 ± 0.3 a, A     | 2.9 ± 0.1 a, A  | 2.7 ± 0.2 a, A   |
| 90 min                                           | 6.5 ± 0.7 c, B               | 5.1 ± 0.1 b, B    | 2.9 ± 0.3 a, A     | 2.8 ± 0.2 a, A  | 2.5 ± 0.2 a, A   |
| 135 min                                          | 6.0 ± 0.5 c, B               | 4.3 ± 1.1 b, AB   | 3.0 ± 0.6 ab, A    | 3.2 ± 0.2 ab, A | 2.3 ± 0.2 a, A   |

<sup>1</sup> Notation of samples as in Table 1.<sup>2</sup> Mean values with the same lowercase letter in the same row are not significantly different according to Tukey's test ( $p > 0.05$ ).<sup>3</sup> Mean values with the same uppercase letter in the same column, for the same rheological parameter, are not significantly different according to Tukey's test ( $p > 0.05$ ).

**Table S3.** Effect of flour from raw and roasted yellow split pea on rheological parameters of wheat flour doughs derived from frequency sweep and creep-recovery test.

| Rheological parameters                                                              | CON <sup>1</sup>           | YSP10          | RYP10           | RYP15          | RYP20         |
|-------------------------------------------------------------------------------------|----------------------------|----------------|-----------------|----------------|---------------|
| <b>Frequency sweep test</b>                                                         |                            |                |                 |                |               |
| Storage modulus (G') at 5.37 Hz (kPa)                                               | 12.6 ± 1.1 ab <sup>2</sup> | 8.4 ± 1.7a     | 12.5 ± 3.5 ab   | 15.1 ± 1.1ab   | 17.2 ± 5.0 b  |
| Loss modulus (G'') at 5.37 Hz (kPa)                                                 | 4.6 ± 0.5 ab               | 2.8 ± 0.4 a    | 4.0 ± 1.0 ab    | 5.2 ± 0.2 b    | 5.4 ± 1.1 b   |
| Damping factor (tanδ) at 5.37 Hz                                                    | 0.36 ± 0.01 a              | 0.35 ± 0.06 a  | 0.33 ± 0.05 a   | 0.36 ± 0.01a   | 0.32 ± 0.04 a |
| Complex viscosity (η*) at 5.37 Hz (kPa·s)                                           | 0.40 ± 0.03ab              | 0.26 ± 0.05 a  | 0.39 ± 0.10 ab  | 0.48 ± 0.03ab  | 0.53 ± 0.15 b |
| <b>Creep-recovery test</b>                                                          |                            |                |                 |                |               |
| Maximum creep strain %                                                              | 1.85 ± 0.41 b              | 1.23 ± 0.07a   | 1.40 ± 0.13 ab  | 1.30 ± 0.14 ab | 1.26 ± 0.12 a |
| <b>Burgers model fitting</b>                                                        |                            |                |                 |                |               |
| Max. Creep Compliance, J <sub>max</sub> (1/Pa) × 10 <sup>4</sup>                    | 15.68 ± 3.21 b             | 9.31 ± 0.42 a  | 11.61 ± 1.50 ab | 9.92 ± 2.21 a  | 8.89 ± 0.45 a |
| <b>Creep phase</b>                                                                  |                            |                |                 |                |               |
| Instantaneous Compliance, J <sub>o</sub> (1/Pa) × 10 <sup>4</sup>                   | 3.49 ± 0.82 a              | 2.45 ± 0.15 a  | 2.81 ± 0.25 a   | 2.60 ± 0.28 a  | 2.53 ± 0.25 a |
| Viscoelastic Compliance, J <sub>m</sub> (1/Pa) × 10 <sup>4</sup>                    | 5.69 ± 1.21 b              | 3.22 ± 0.35 a  | 4.01 ± 0.64 ab  | 3.13 ± 0.72 a  | 3.06 ± 0.27 a |
| Zero Shear Viscosity, η <sub>o</sub> (Pa·s) × 10 <sup>-6</sup>                      | 0.20 ± 0.05 a              | 0.32 ± 0.06 ab | 0.24 ± 0.03 ab  | 0.29 ± 0.09ab  | 0.34 ± 0.01 b |
| <b>Recovery phase</b>                                                               |                            |                |                 |                |               |
| Instantaneous Compliance, J <sub>o</sub> (1/Pa) × 10 <sup>4</sup>                   | 4.24 ± 0.52 a              | 3.94 ± 0.5 a   | 4.23 ± 0.41 a   | 4.02 ± 0.19 a  | 3.23 ± 0.60 a |
| Viscoelastic Compliance, J <sub>m</sub> (1/Pa) × 10 <sup>4</sup>                    | 2.71 ± 0.35 b              | 2.36 ± 0.04 ab | 2.61 ± 0.24 b   | 2.40 ± 0.06 ab | 1.71 ± 0.50 a |
| Mean Retardation Time, λ (s)                                                        | 62.1 ± 10.1 a              | 65.5 ± 7.9 a   | 64.1 ± 5.3a     | 61.5 ± 0.7a    | 55.1 ± 1.7 a  |
| Relative elastic portion of J <sub>max</sub> , J <sub>e</sub> /J <sub>max</sub> (%) | 61.8 ± 5.5 a               | 64.3 ± 4.7 a   | 57.0 ± 4.4 a    | 59.2 ± 4.2 a   | 55.3 ± 7.0 a  |

<sup>1</sup> Notation of samples as in Table 1.

<sup>2</sup> Mean values with the same letter in the same row are not significantly different according to Tukey's test (p > 0.05).

**Table S4.** Appearance parameters of wheat-based breads fortified with yellow split pea flours.

|                             | CON <sup>1</sup>           | YSP10          | RYSP10        | RYSP15         | RYSP20        |
|-----------------------------|----------------------------|----------------|---------------|----------------|---------------|
| Loaf specific volume (ml/g) | 2.81 ± 0.13 c <sup>2</sup> | 2.67 ± 0.13 bc | 2.92 ± 0.16 c | 2.41 ± 0.09 ab | 2.30 ± 0.10 a |
| <b>Bread crust color</b>    |                            |                |               |                |               |
| L*                          | 60.7 ± 2.8 b               | 48.2 ± 1.4 ab  | 52.3 ± 0.8 b  | 45.7 ± 1.1 a   | 44.3 ± 1.0 a  |
| a*                          | 10.1 ± 1.2 a               | 13.3 ± 0.4 bc  | 13.0 ± 0.4 b  | 14.1 ± 0.4 bc  | 14.9 ± 0.4 c  |
| b*                          | 32.5 ± 2.3 c               | 28.5 ± 0.6 ab  | 31.2 ± 0.5 bc | 26.6 ± 0.6 a   | 26.4 ± 0.8 a  |
| C*                          | 34.0 ± 2.3 b               | 31.5 ± 0.5 ab  | 33.8 ± 0.5 b  | 30.5 ± 0.7 a   | 30.2 ± 0.4a   |
| h <sub>ab</sub> (°)         | 72.8 ± 1.9 d               | 64.9 ± 0.9 bc  | 67.2 ± 0.5 c  | 61.9 ± 1.1 ab  | 60.2 ± 1.0 a  |
| <b>Bread crumb color</b>    |                            |                |               |                |               |
| L*                          | 68.4 ± 1.0 a               | 67.8 ± 0.5 a   | 68.1 ± 0.6 a  | 66.2 ± 1.5 ab  | 64.9 ± 1.1 b  |
| a*                          | -1.5 ± 0.14 a              | -1.7 ± 0.1 a   | -1.7 ± 0.1 a  | -1.9 ± 0.1 a   | -1.0 ± 0.3 b  |
| b*                          | 15.8 ± 3.5 a               | 16.2 ± 0.5 ab  | 16.8 ± 0.2 ab | 18.6 ± 0.3 ab  | 20.1 ± 1.2 b  |
| C*                          | 15.9 ± 3.5 a               | 16.3 ± 0.5 ab  | 16.9 ± 0.3ab  | 18.6 ± 0.3 ab  | 20.7 ± 1.3 b  |
| h <sub>ab</sub> (°)         | 95.7 ± 0.3 b               | 96.1 ± 0.2 b   | 95.7 ± 0.3 b  | 95.8 ± 0.2b    | 92.9 ± 0.7 a  |

<sup>1</sup> Notation of samples as in Table 1.

<sup>2</sup> Mean values with the same letter in the same row are not significantly different according to Tukey's test (p > 0.05).

**Table S5.** Crumb and crust texture characteristics assessed by TPA and puncture test, respectively and moisture contents of fresh wheat-based breads fortified with yellow split pea flours, and their change rate during product storage at 25 °C.

|                                                           | CON <sup>3</sup>           | YSP10           | RYSP10          | RYSP15          | RYSP20         |
|-----------------------------------------------------------|----------------------------|-----------------|-----------------|-----------------|----------------|
| <b>Crumb</b>                                              |                            |                 |                 |                 |                |
| Hardness (N) <sup>1</sup>                                 | 10.59 ± 0.5 a <sup>4</sup> | 11.91 ± 1.34 ab | 8.92 ± 1.73 a   | 14.88 ± 2.42 bc | 17.65 ± 1.60 c |
| Hardening rate (N·d <sup>-1</sup> ) <sup>2</sup>          | 3.80 ± 0.30 ab             | 2.56 ± 0.51 a   | 2.45 ± 0.45 a   | 3.40 ± 0.49 ab  | 4.19 ± 0.92 b  |
| Cohesiveness <sup>1</sup>                                 | 0.68 ± 0.01 a              | 0.66 ± 0.03 a   | 0.69 ± 0.02 a   | 0.67 ± 0.02 a   | 0.66 ± 0.01 a  |
| Cohesiveness loss rate (d <sup>-1</sup> ) <sup>2</sup>    | 0.06 ± 0.01 a              | 0.06 ± 0.00a    | 0.06 ± 0.01 a   | 0.07 ± 0.00 a   | 0.06 ± 0.00 a  |
| Resilience <sup>1</sup>                                   | 0.38 ± 0.01 b              | 0.35 ± 0.02 ab  | 0.37 ± 0.01 ab  | 0.36 ± 0.02 ab  | 0.33 ± 0.01 a  |
| Resilience loss rate (d <sup>-1</sup> ) <sup>2</sup>      | 0.05 ± 0.00 a              | 0.04 ± 0.00 a   | 0.04 ± 0.01 a   | 0.05 ± 0.01 a   | 0.04 ± 0.00 a  |
| Springiness <sup>1</sup>                                  | 0.92 ± 0.01 a              | 0.91 ± 0.02 a   | 0.93 ± 0.02 a   | 0.90 ± 0.01 a   | 0.90 ± 0.01 a  |
| Springiness loss rate (d <sup>-1</sup> ) <sup>2</sup>     | 0.02 ± 0.01 a              | 0.02 ± 0.01 a   | 0.02 ± 0.01 a   | 0.02 ± 0.01 a   | 0.03 ± 0.01 a  |
| Chewiness <sup>1</sup> (N)                                | 6.60 ± 0.25 a              | 6.47 ± 0.79 a   | 5.84 ± 1.06 a   | 7.90 ± 0.75 a   | 10.50 ± 1.18 b |
| Chewiness increase rate (N·d <sup>-1</sup> ) <sup>2</sup> | 0.49 ± 0.09 b              | 0.28 ± 0.06 ab  | 0.28 ± 0.11 ab  | 0.19 ± 0.05 ab  | 0.10 ± 0.03a   |
| Moisture content <sup>1</sup> (%)                         | 43.53 ± 0.24 a             | 43.76 ± 0.21 a  | 43.92 ± 0.23 a  | 44.29 ± 0.23 a  | 44.32 ± 0.58 a |
| Moisture loss rate (% · d <sup>-1</sup> ) <sup>2</sup>    | 0.44 ± 0.07 a              | 0.36 ± 0.12 ab  | 0.47 ± 0.06 a   | 0.30 ± 0.08 ab  | 0.18 ± 0.04 b  |
| <b>Crust</b>                                              |                            |                 |                 |                 |                |
| Hardness (N) <sup>1</sup>                                 | 10.50 ± 0.17 a             | 11.18 ± 1.53 a  | 12.25 ± 0.21 a  | 12.11 ± 1.53 a  | 10.45 ± 1.90 a |
| Softening rate (N·d <sup>-1</sup> ) <sup>2</sup>          | 1.06 ± 0.11 b              | 1.80 ± 0.25 a   | 1.51 ± 0.22 ab  | 1.85 ± 0.28 a   | 1.68 ± 0.34 ab |
| Moisture content (%) <sup>1</sup>                         | 17.11 ± 0.41 a             | 19.16 ± 0.89 b  | 19.41 ± 0.61 bc | 20.71 ± 0.11 bc | 21.58 ± 0.22 d |
| Moisture gain rate (% · d <sup>-1</sup> ) <sup>2</sup>    | 1.99 ± 0.35 a              | 1.86 ± 0.16 a   | 1.34 ± 0.36 a   | 2.00 ± 0.25 a   | 1.99 ± 0.10a   |

<sup>1</sup> Textural parameters and moisture contents evaluated after 2 h of bread storage (0 day).

<sup>2</sup> Calculated from the slope of the linear regression model fitted to the data of the textural parameter or moisture values versus storage time.

<sup>3</sup> Notation of samples as in Table 1.

<sup>4</sup> Mean values with the same letter in the same row are not significantly different according to Tukey's test (p > 0.05).

**Table S6.** Starch retrogradation parameters of crumbs of wheat breads fortified with yellow split pea flour as evaluated by DSC analysis; breads were stored at 25°C.

| <b>Starch retrogradation parameters</b>                                        | <b>CON <sup>6</sup></b>     | <b>YSP10</b>   | <b>RYSP10</b>  | <b>RYSP20</b> |
|--------------------------------------------------------------------------------|-----------------------------|----------------|----------------|---------------|
| Onset temperature, $T_{o\text{ret}}$ (°C) <sup>1</sup>                         | 45.37 ± 0.87 a <sup>7</sup> | 45.21 ± 0.47 a | 45.98 ± 0.51 a | 45.43 ± 1.09a |
| Peak temperature, $T_{p\text{ret}}$ (°C) <sup>1</sup>                          | 55.09 ± 1.17 a              | 54.11 ± 0.09 a | 55.22 ± 0.61 a | 56.32 ± 0.39a |
| Apparent melting enthalpy, $\Delta H_{\text{ret}}$ (mJ/mg starch) <sup>1</sup> | 2.51 ± 0.11 a               | 2.21 ± 0.25 a  | 2.36 ± 0.03 a  | 3.08 ± 0.20 b |
| $\Delta H_{\text{ret}}$ increase rate (mJ/mg starch/d) <sup>2</sup>            | 0.53 ± 0.03 a               | 0.48 ± 0.05 a  | 0.51 ± 0.02 a  | 0.65 ± 0.05 b |
| RI (%) <sup>3</sup>                                                            | 35.0 a                      | 34.7 a         | 35.6 a         | 43.3 b        |

<sup>1</sup>  $T_{o\text{ret}}$ ,  $T_{p\text{ret}}$ ,  $\Delta H_{\text{ret}}$ : parameters of melting of the retrograded amylopectin at the 4<sup>th</sup> day of bread storage.

<sup>2</sup>  $\Delta H_{\text{ret}}$  increase rate: calculated from the slope of the linear regression model fitted to the data of the apparent melting enthalpy of the retrograded amylopectin,  $\Delta H_{\text{ret}}$ , versus storage time.

<sup>3</sup> RI (%): retrogradation index calculated at the 4<sup>th</sup> day of bread storage.

<sup>4</sup> Notation of samples as in Table 1.

<sup>5</sup> Mean values with the same letter in the same row are not significantly different according to Tukey's test ( $p > 0.05$ ).



**Table S7.** Proximate composition and *in vitro* starch digestibility of breads fortified with yellow split pea flours.

|                  | <b>Protein</b>      | <b>TDF <sup>2</sup></b> | <b>Carbohydrates</b> | <b>Fat</b> | <b>TDS <sup>2</sup></b>         | <b>RS <sup>5</sup></b> | <b>AUC <sup>6</sup></b>       |
|------------------|---------------------|-------------------------|----------------------|------------|---------------------------------|------------------------|-------------------------------|
|                  | <b>g/100g bread</b> |                         |                      |            | <b>g/100g b.c. <sup>4</sup></b> |                        | <b>(g glucose /g TDS)·min</b> |
| CON <sup>1</sup> | 8.0                 | 2.0                     | 52.1                 | 1.1        | 36.3 ± 1.5a <sup>3</sup>        | 0.55 ± 0.15 a          | 97.2 ± 6.2 b                  |
| YSP10            | 9.1                 | 3.0                     | 49.6                 | 1.1        | 36.6 ± 1.1 a                    | 0.93 ± 0.10 ± ab       | 88.2 ± 3.5 b                  |
| RYP10            | 9.1                 | 3.0                     | 49.9                 | 1.1        | 35.1 ± 1.2 a                    | 0.82 ± 0.15 ab         | 93.3 ± 12.0 b                 |
| RYP15            | 9.5                 | 3.4                     | 47.6                 | 1.1        | n.d. <sup>4</sup>               | n.d.                   | n.d.                          |
| RYP20            | 10.0                | 3.8                     | 45.9                 | 1.1        | 34.9 ± 1.0 a                    | 1.52 ± 0.32c           | 78.4 ± 5.0 a                  |

<sup>1</sup> Notation of samples as in Table 1.

<sup>2</sup> TDF: Total Dietary Fiber; TDS: Total Digestible Starch; RS: Resistant starch.

<sup>3</sup> Mean values with the same letter in the same column are not significantly different according to Tukey's test ( $p > 0.05$ ).

<sup>4</sup> n.d.: not determined.

<sup>5</sup> b.c.: bread crumb.

<sup>6</sup> AUC: Area under the curve of released glucose over 300 min of *in vitro* starch digestion.
